# Supplementary material for: Inverse vulcanization employing epoxy compounds as crosslinking agents for elemental sulfur in the preparation of sulfur-rich epoxy resins
Source: Royal Society of Chemistry journal article supplement (doi:10.1039/d4py00074a), 2024-01-01
Supplement: d4py00074a1.pdf [file d4py00074a1.pdf]

## Electronic supplementary information (ESI) for

### Inverse vulcanization employing epoxy compounds as crosslinking agents for elemental sulfur in preparation of sulfur-rich epoxy resins

*Yue-Sheng Lai and Ying-Ling Liu\**

Department of Chemical Engineering, National Tsing Hua University, No. 101, Sec. 2,  
Kuang-Fu Road, Hsinchu 300044, Taiwan.

\* Corresponding author, E-mail: liuyl@mx.nthu.edu.tw

Figures and Table discussed in the main text.



**Figure S1.** Photographs on the elemental sulfur/DGEBA (w/w 50/50) reaction systems (a) at 180 °C for 24 h, (b) at 150 °C for 24 h. Plot (c) shows the solubility tests on poly(S-DGEBA-50) in various solvents.



**Figure S2.**  $^1\text{H}$  NMR spectra recorded on the mixture of elemental sulfur/DGEBA (w/w 50/50) reaction system at 180 oC for various reaction time.



**Figure S3.**  $^{13}\text{C}$ -DEPT NMR spectra of S-PGE-50.



Figure S4.  $^1\text{H}$ - $^{13}\text{C}$  HSQC NMR spectra of S-PGE-50.



Figure S5.  $^1\text{H}$  NMR spectra of BPE and S-BPE tracing the model reaction between  $\text{S}_8$  and BPE.



**Figure S6.** Photographs showing the physically recyclable and reprocessable feature of poly(S-DGEBA-50).



**Figure S7.** (a) DSC thermograms and (b) XRD spectra of poly(S-DGEBA-60) showing some crystalline sulfur remained in the sample.



**Figure S8.** TGA thermograms of sulfur polymers prepared with various epoxy compounds in this work.



**Figure S9.** Stress-strain curves of the sulfur polymers from the inverse vulcanization reactions between  $S_8$  and epoxy compounds..

**Table S1.** Elemental analysis data of the prepared S-DGEBA samples.

| Sample           | Elemental analysis (wt%) |      |       |       | H/C atomic ratios |                 |
|------------------|--------------------------|------|-------|-------|-------------------|-----------------|
|                  | C                        | H    | S     | O     | Epoxy reagents    | Sulfur polymers |
| Poly(S-DGEBA-10) | 66.76                    | 6.34 | 9.98  | 18.42 | 1.14              | 1.14            |
| Poly(S-DGEBA-20) | 59.84                    | 5.72 | 18.85 | 17.49 | 1.14              | 1.14            |
| Poly(S-DGEBA-30) | 53.13                    | 5.05 | 28.18 | 15.61 | 1.14              | 1.14            |
| Poly(S-DGEBA-40) | 48.19                    | 4.46 | 35.12 | 14.36 | 1.14              | 1.11            |
| Poly(S-DGEBA-50) | 41.31                    | 3.76 | 44.53 | 12.49 | 1.14              | 1.09            |
